# Supplementary material for: Dlk1-Dio3 locus-derived lncRNAs perpetuate postmitotic motor neuron cell fate and subtype identity
Source: eLife. 2018 Oct 12;7:e38080. doi: 10.7554/eLife.38080 (PMC6221546; doi:10.7554/eLife.38080)
Supplement: Supplementary file 1. — Values indicate the stage-specific scores (see Materials and methods), 70 stage-signature lncRNAs during the ESC~MN differentiation process are uncovered (ESC, NE, pMN, MN, and IN showed in Figure 1C). [file elife-38080-supp1.xlsx]

## Sheet: Sheet1
LincRNA	ESC	D2	D4	MN	IN
Wt1os	0.0476037	0.831854	0.0574572	0.0144972	0.0485877
Gm42485	0.121088	0.737973	0.0796375	0.0462759	0.0150249
1810019N24Rik	0.13045	0.710876	0.0591559	0.0430739	0.0564448
Gm14004	0.14916	0.684939	0.0354408	0.0728147	0.0576458
RP24-177G14.2	0.19904	0.680155	0.0349308	0.0578121	0.0280616
Has2os	0.214675	0.669751	0.0323744	0.0269654	0.0562337
Gm26887	0.273634	0.647239	0.0260742	0.033399	0.0196537
Gm26707	0.139585	0.63936	0.0630561	0.0969746	0.0610243
Gm38103	0.0090849	0.00304962	0.968464	0.0179177	0.00148363
Gm5607	0.0124209	0.0463717	0.745443	0.0804744	0.11529
C130026L21Rik	0.00274919	0.0123047	0.698206	0.0918566	0.194883
B230323A14Rik	0.0154681	0.104371	0.673856	0.108325	0.0979803
9030622O22Rik	0.00500756	0.0100056	0.662541	0.283504	0.0389415
A730046J19Rik	0	0.000274982	0.000799319	0.998569	0.000356741
Gm29374	0.000366061	0.00245759	0.000446482	0.988493	0.0082364
Gm9954	0	0.000647671	0	0.988219	0.0111332
Gm2990	0.000817216	0.00424547	0.00550588	0.985364	0.00406728
Gm42668	0	0.005475	0.00318296	0.980925	0.0104175
B130024G19Rik	0.00124145	0.000277822	0.0148055	0.952499	0.0311767
Gm14697	0.00107798	0.00395361	0.00798623	0.902221	0.0847609
Gm26811	0.031645	0.021336	0.0349686	0.823122	0.0889283
C030034L19Rik	0.0387228	0.0166092	0.0603496	0.784075	0.100243
9330158H04Rik	0.00240607	0.00583317	0.00717366	0.780846	0.203741
8430419K02Rik	0.00335214	0.00210985	0.0327088	0.775855	0.185975
1700123O21Rik	0	0.00138575	0.00201406	0.768282	0.228318
RP23-474J16.2	0.0195402	0.0541138	0.0369412	0.748999	0.140406
Gm16365	0.0328443	0.0215909	0.0614254	0.736936	0.147204
Gm9801	0.00350131	0.0157149	0.0190157	0.729012	0.232756
Gm2694	0.0247931	0.0176539	0.0104176	0.72534	0.221795
Gm16083	0.0553494	0.0476403	0.0113752	0.705077	0.180559
RP24-274B19.1	0.00380642	0.00495247	0.00539846	0.691772	0.294071
Gm26871	0.00105267	0.00230453	0.001898	0.690657	0.304088
Gm27000	0.0805844	0.064832	0.038449	0.686105	0.130029
E130006D01Rik	0.00927403	0.0339415	0.0596995	0.68393	0.213154
Gm2415	0.0172552	0.0370059	0.0678152	0.68241	0.195514
RP23-54G8.4	0.00257987	0.00246219	0.0112292	0.664523	0.319206
Meg3	0.0768261	0.0673755	0.0332081	0.6563	0.16629
RP23-54G8.1	0.00327489	0.00273574	0.0090466	0.654156	0.330787
Gm27247	0.114029	0.0960988	0.0228852	0.649265	0.117722
Gm28055	0.0431292	0.0621514	0.117962	0.621663	0.155095
Dubr	0.109154	0.092007	0.0455564	0.619723	0.13356
Gm27199	0	0.000687546	0.000999281	0.00228118	0.996032
Gm14204	0.000101619	0.0010802	0.000661037	0.00311238	0.995045
4930469K13Rik	0.00173557	0.00679695	0.00987869	0.0128865	0.968702
Gm17750	0.00317561	0.00399746	0.00774656	0.0331576	0.951923
Gm3764	0.000262248	0.0126423	0.000355404	0.0394709	0.947269
2700069I18Rik	0.00383487	0.00150184	0.00873109	0.0551677	0.930764
Lhx1os	0.00157278	0.00078215	0.00326824	0.0641468	0.93023
RP23-207N5.2	0.000892196	0.000935914	0.000272052	0.0694538	0.928446
Hoxb5os	0.00590872	0.0167829	0.0358496	0.0489341	0.892525
D030068K23Rik	0.0116402	0.0731757	0.0154188	0.019574	0.880191
C130021I20Rik	0.011714	0.00207798	0.0479736	0.0746454	0.863589
AI854517	0.00201268	0.011019	0.00367059	0.130867	0.852431
A730020E08Rik	0.00224379	0.00502131	0.00425716	0.154105	0.834373
RP23-240M8.2	0.000376995	0.00112489	0.0034742	0.167484	0.82754
9430041J12Rik	0.0390515	0.00631165	0.0148185	0.170752	0.769067
2810049E08Rik	0.0008056	0.00630989	0.0438889	0.182437	0.766559
Pantr1	0.000132714	0.000278434	0.0471045	0.193538	0.758947
Gm12239	0.00771094	0.00662508	0.0344849	0.224412	0.726767
C130071C03Rik	0.0236558	0.0317697	0.0767609	0.142224	0.72559
Gm14342	0.00512956	0.0320671	0.0904927	0.148414	0.723897
RP23-216D14.3	0.0723294	0.0433224	0.0359799	0.140579	0.70779
C230034O21Rik	0.0119179	0.00124201	0.00579548	0.278266	0.702779
BC006965	0.00525539	0.00457367	0.0123452	0.276399	0.701427
F630040K05Rik	0.0605669	0.0939416	0.0404401	0.123852	0.6812
C530044C16Rik	0.00361858	0.00323916	0.00470781	0.315024	0.67341
Gm26870	0.00903022	0.000891549	0.0969676	0.231713	0.661398
Gm20646	0.00160428	0.00179508	0.110229	0.225577	0.660795
