# Supplementary material for: Dlk1-Dio3 locus-derived lncRNAs perpetuate postmitotic motor neuron cell fate and subtype identity
Source: eLife. 2018 Oct 12;7:e38080. doi: 10.7554/eLife.38080 (PMC6221546; doi:10.7554/eLife.38080)
Supplement: Supplementary file 2. — Only the highly expressed (TMM normalized read count >10 in all samples) lncRNAs are shown. [file elife-38080-supp2.xlsx]

## Sheet: LNC_602
Gene	Val
0610009E02Rik_LNC	0.282573
0610040B10Rik_LNC	0.344087
0610040F04Rik_LNC	0.559177
1110002J07Rik_LNC	0.368282
1110002L01Rik_LNC	0.301395
1110019D14Rik_LNC	0.368341
1110038B12Rik_LNC	0.307628
1300002E11Rik_LNC	0.309754
1500004A13Rik_LNC	0.347965
1500015A07Rik_LNC	0.240473
1600010M07Rik_LNC	0.289387
1600020E01Rik_LNC	0.273144
1700001L05Rik_LNC	0.473193
1700007L15Rik_LNC	0.383947
1700020I14Rik_LNC	0.265081
1700030C10Rik_LNC	0.361918
1700034P13Rik_LNC	0.343165
1700084C06Rik_LNC	0.234373
1700086O06Rik_LNC	0.246954
1700093J21Rik_LNC	0.39128
1700112D23Rik_LNC	0.241932
1700120C14Rik_LNC	0.385105
1700123M08Rik_LNC	0.283534
1700123O21Rik_LNC	0.643851
1810010H24Rik_LNC	0.341914
1810014B01Rik_LNC	0.396186
1810019N24Rik_LNC	0.597173
1810026B05Rik_LNC	0.279525
1810058I24Rik_LNC	0.265732
2010204K13Rik_LNC	0.346839
2010320M18Rik_LNC	0.275549
2310008N11Rik_LNC	0.28518
2310009A05Rik_LNC	0.259697
2310010J17Rik_LNC	0.290257
2310015A10Rik_LNC	0.300077
2310058D17Rik_LNC	0.297797
2410003L11Rik_LNC	0.418242
2410006H16Rik_LNC	0.309103
2410017I17Rik_LNC	0.667886
2410018L13Rik_LNC	0.254113
2410022M11Rik_LNC	0.296068
2500002B13Rik_LNC	0.346754
2500004C02Rik_LNC	0.272869
2600014E21Rik_LNC	0.276212
2610020C07Rik_LNC	0.266487
2610035D17Rik_LNC	0.479366
2610037D02Rik_LNC	0.325587
2610203C20Rik_LNC	0.49987
2610306M01Rik_LNC	0.316744
2610307P16Rik_LNC	0.478607
2610316D01Rik_LNC	0.448714
2610507I01Rik_LNC	0.305807
2700033N17Rik_LNC	0.381081
2700038G22Rik_LNC	0.318836
2700069I18Rik_LNC	0.81155
2810001G20Rik_LNC	0.348021
2810002D19Rik_LNC	0.290234
2810029C07Rik_LNC	0.393236
2810032G03Rik_LNC	0.469855
2810049E08Rik_LNC	0.642398
2810402E24Rik_LNC	0.269157
2810403D21Rik_LNC	0.287729
2810408I11Rik_LNC	0.327318
2810410L24Rik_LNC	0.476423
2810429I04Rik_LNC	0.329996
2810468N07Rik_LNC	0.370819
2900009J06Rik_LNC	0.260395
2900052L18Rik_LNC	0.308441
2900076A07Rik_LNC	0.265233
2900097C17Rik_LNC	0.27984
3010001F23Rik_LNC	0.386761
3110045C21Rik_LNC	0.292555
3110056K07Rik_LNC	0.247005
4632404H12Rik_LNC	0.324627
4632415L05Rik_LNC	0.285886
4632427E13Rik_LNC	0.282234
4732416N19Rik_LNC	0.280943
4732471J01Rik_LNC	0.306594
4732487G21Rik_LNC	0.336154
4732491K20Rik_LNC	0.309574
4833417C18Rik_LNC	0.279826
4833418N02Rik_LNC	0.369966
4833422C13Rik_LNC	0.388207
4833445I07Rik_LNC	0.28202
4921531C22Rik_LNC	0.340709
4930422M22Rik_LNC	0.326925
4930444M15Rik_LNC	0.643908
4930448N21Rik_LNC	0.506859
4930461G14Rik_LNC	0.728706
4930469K13Rik_LNC	0.874189
4930473A02Rik_LNC	0.392495
4930480K23Rik_LNC	0.307326
4930481A15Rik_LNC	0.278439
4930509G22Rik_LNC	0.253043
4930512B01Rik_LNC	0.496508
4930513N10Rik_LNC	0.317543
4930516B21Rik_LNC	0.315143
4930517O19Rik_LNC	0.414366
4930525G20Rik_LNC	0.311023
4930539J05Rik_LNC	0.291957
4930552N02Rik_LNC	0.28953
4930556M19Rik_LNC	0.323357
4930557F10Rik_LNC	0.39172
4930558J18Rik_LNC	0.299043
4930558J22Rik_LNC	0.377152
4930578M01Rik_LNC	0.496597
4930581F22Rik_LNC	0.258516
4930586N03Rik_LNC	0.429517
4930599N23Rik_LNC	0.367866
4931419H13Rik_LNC	0.242264
4931440J10Rik_LNC	0.261501
4932441J04Rik_LNC	0.266663
4933404O12Rik_LNC	0.348285
4933406I18Rik_LNC	0.389835
4933407K13Rik_LNC	0.246743
4933413J09Rik_LNC	0.474752
4933421O10Rik_LNC	0.297654
5031425E22Rik_LNC	0.307612
5330434G04Rik_LNC	0.526981
5430405H02Rik_LNC	0.304161
5430416N02Rik_LNC	0.297881
5530601H04Rik_LNC	0.245856
5730405O15Rik_LNC	0.336187
5730585A16Rik_LNC	0.465826
5930403N24Rik_LNC	0.519875
5930412G12Rik_LNC	0.520506
6030442K20Rik_LNC	0.29998
6030443J06Rik_LNC	0.286301
6230400D17Rik_LNC	0.300638
6330403K07Rik_LNC	0.533236
6530409C15Rik_LNC	0.321221
6720427I07Rik_LNC	0.272658
8430419K02Rik_LNC	0.65028
8430429K09Rik_LNC	0.267823
9030622O22Rik_LNC	0.559992
9130019P16Rik_LNC	0.444057
9230112E08Rik_LNC	0.276318
9230114K14Rik_LNC	0.326012
9330104G04Rik_LNC	0.360626
9330111N05Rik_LNC	0.307668
9330136K24Rik_LNC	0.279537
9330158H04Rik_LNC	0.65456
9330159M07Rik_LNC	0.315811
9330179D12Rik_LNC	0.288492
9330185C12Rik_LNC	0.617412
9430041J12Rik_LNC	0.644514
9430091E24Rik_LNC	0.271386
9530026P05Rik_LNC	0.368639
9530052E02Rik_LNC	0.301294
9530059O14Rik_LNC	0.508471
9530082P21Rik_LNC	0.314526
9930104L06Rik_LNC	0.297843
A230006K03Rik_LNC	0.322914
A230056P14Rik_LNC	0.442314
A230072C01Rik_LNC	0.246661
A330023F24Rik_LNC	0.326304
A330033J07Rik_LNC	0.488135
A330035P11Rik_LNC	0.27781
A330069E16Rik_LNC	0.298476
A430046D13Rik_LNC	0.367569
A430073D23Rik_LNC	0.294294
A530053G22Rik_LNC	0.476646
A530072M11Rik_LNC	0.270978
A530083I20Rik_LNC	0.315256
A630052C17Rik_LNC	0.256021
A730020E08Rik_LNC	0.70299
A730046J19Rik_LNC	0.973244
A730081D07Rik_LNC	0.328672
A830082K12Rik_LNC	0.470473
A930006K02Rik_LNC	0.359528
A930007I19Rik_LNC	0.280139
A930015D03Rik_LNC	0.485788
AA465934_LNC	0.295983
AA543186_LNC	0.273249
AI506816_LNC	0.344817
AI662270_LNC	0.45088
AI847159_LNC	0.243668
AI854517_LNC	0.720663
AU020206_LNC	0.347814
AV099323_LNC	0.284714
Abhd11os_LNC	0.392794
Airn_LNC	0.465184
Appbp2os_LNC	0.270003
Arf4os_LNC	0.288485
Atad3aos_LNC	0.323695
B130024G19Rik_LNC	0.844541
B130034C11Rik_LNC	0.382757
B130055M24Rik_LNC	0.312248
B230217O12Rik_LNC	0.375168
B230323A14Rik_LNC	0.568561
B230334C09Rik_LNC	0.514325
B230354K17Rik_LNC	0.272835
B230369F24Rik_LNC	0.327294
B930036N10Rik_LNC	0.287864
BB218582_LNC	0.317604
BC006965_LNC	0.589778
BC039771_LNC	0.368931
BC051226_LNC	0.294682
BC065397_LNC	0.279009
Brip1os_LNC	0.333039
Bvht_LNC	0.439836
C030014I23Rik_LNC	0.416221
C030034L19Rik_LNC	0.657347
C030037D09Rik_LNC	0.328828
C130021I20Rik_LNC	0.732026
C130026L21Rik_LNC	0.587272
C130036L24Rik_LNC	0.301175
C130046K22Rik_LNC	0.32409
C130060C02Rik_LNC	0.309542
C130071C03Rik_LNC	0.608833
C230004F18Rik_LNC	0.444939
C230034O21Rik_LNC	0.590832
C230035I16Rik_LNC	0.312629
C230062I16Rik_LNC	0.36658
C230088H06Rik_LNC	0.348194
C330002G04Rik_LNC	0.637964
C330006A16Rik_LNC	0.292674
C530005A16Rik_LNC	0.363614
C530044C16Rik_LNC	0.568222
C630043F03Rik_LNC	0.359444
C920006O11Rik_LNC	0.294839
C920021L13Rik_LNC	0.290772
Cct6a_LNC	0.308513
Cep83os_LNC	0.279449
Crnde_LNC	0.483185
D030055H07Rik_LNC	0.48756
D030068K23Rik_LNC	0.749681
D130058E05Rik_LNC	0.335469
D230017M19Rik_LNC	0.279861
D330023K18Rik_LNC	0.353205
D330041H03Rik_LNC	0.328145
D430040D24Rik_LNC	0.349404
D930007P13Rik_LNC	0.422095
D930016D06Rik_LNC	0.279805
Dancr_LNC	0.290873
Dleu2_LNC	0.268579
Dubr_LNC	0.52815
E130006D01Rik_LNC	0.576256
E130102H24Rik_LNC	0.300918
E130307A14Rik_LNC	0.383433
E130317F20Rik_LNC	0.261906
E230016M11Rik_LNC	0.410921
E430024P14Rik_LNC	0.324468
E530001K10Rik_LNC	0.329677
E530011L22Rik_LNC	0.281463
EU599041_LNC	0.533329
Eldr_LNC	0.318743
Epb41l4aos_LNC	0.329864
Etohd2_LNC	0.270042
F630040K05Rik_LNC	0.574164
F730043M19Rik_LNC	0.426186
Fam120aos_LNC	0.278644
Fbxl12os_LNC	0.338739
Firre_LNC	0.275509
Foxd2os_LNC	0.445717
Ftx_LNC	0.250858
G630016G05Rik_LNC	0.41639
Gas5_LNC	0.288571
Gm10010_LNC	0.296613
Gm10069_LNC	0.353528
Gm10125_LNC	0.394213
Gm10416_LNC	0.465269
Gm10501_LNC	0.286616
Gm10516_LNC	0.402625
Gm10524_LNC	0.367304
Gm10822_LNC	0.372348
Gm10874_LNC	0.299953
Gm11335_LNC	0.289398
Gm11508_LNC	0.26121
Gm11520_LNC	0.420212
Gm11613_LNC	0.420368
Gm11650_LNC	0.456381
Gm11867_LNC	0.261546
Gm11906_LNC	0.294733
Gm11973_LNC	0.252975
Gm11974_LNC	0.318192
Gm12111_LNC	0.300904
Gm12239_LNC	0.609775
Gm12319_LNC	0.289528
Gm12503_LNC	0.404533
Gm12592_LNC	0.399034
Gm12655_LNC	0.227135
Gm12743_LNC	0.285427
Gm12905_LNC	0.260638
Gm12940_LNC	0.327613
Gm12992_LNC	0.337487
Gm13052_LNC	0.481813
Gm13067_LNC	0.293054
Gm13110_LNC	0.483508
Gm13261_LNC	0.430066
Gm13375_LNC	0.363506
Gm13421_LNC	0.325378
Gm13427_LNC	0.393934
Gm13483_LNC	0.397339
Gm13830_LNC	0.324816
Gm13849_LNC	0.407256
Gm13936_LNC	0.529224
Gm14004_LNC	0.57703
Gm14005_LNC	0.646703
Gm14066_LNC	0.421523
Gm14164_LNC	0.421911
Gm14204_LNC	0.95018
Gm14230_LNC	0.348784
Gm14342_LNC	0.607482
Gm14565_LNC	0.530184
Gm14634_LNC	0.419867
Gm14697_LNC	0.774827
Gm14966_LNC	0.269763
Gm15246_LNC	0.324723
Gm15270_LNC	0.389534
Gm15283_LNC	0.440545
Gm15286_LNC	0.309009
Gm15441_LNC	0.303092
Gm15489_LNC	0.281168
Gm15494_LNC	0.353584
Gm15506_LNC	0.33651
Gm15545_LNC	0.272491
Gm15559_LNC	0.322952
Gm15601_LNC	0.526991
Gm15608_LNC	0.312715
Gm15706_LNC	0.287147
Gm15832_LNC	0.283216
Gm15834_LNC	0.337556
Gm15879_LNC	0.293229
Gm15952_LNC	0.268678
Gm16001_LNC	0.346963
Gm16008_LNC	0.318354
Gm16066_LNC	0.33664
Gm16083_LNC	0.592626
Gm16091_LNC	0.394397
Gm16163_LNC	0.305092
Gm16233_LNC	0.447085
Gm16275_LNC	0.501895
Gm16365_LNC	0.617956
Gm16386_LNC	0.38806
Gm16576_LNC	0.329369
Gm16586_LNC	0.292802
Gm16618_LNC	0.268915
Gm16638_LNC	0.382203
Gm16835_LNC	0.273282
Gm16853_LNC	0.33515
Gm16973_LNC	0.256111
Gm17106_LNC	0.327982
Gm17188_LNC	0.302378
Gm17249_LNC	0.272178
Gm17259_LNC	0.259162
Gm17354_LNC	0.302041
Gm17435_LNC	0.288966
Gm17494_LNC	0.476861
Gm17501_LNC	0.512158
Gm17586_LNC	0.281487
Gm17750_LNC	0.843585
Gm17768_LNC	0.52891
Gm19265_LNC	0.325652
Gm19705_LNC	0.571892
Gm1976_LNC	0.250576
Gm20033_LNC	0.313169
Gm20045_LNC	0.328793
Gm20507_LNC	0.386395
Gm20559_LNC	0.894417
Gm20628_LNC	0.332994
Gm20632_LNC	0.288386
Gm20646_LNC	0.558676
Gm20667_LNC	0.305149
Gm20732_LNC	0.26374
Gm20754_LNC	0.320727
Gm2115_LNC	0.816755
Gm21781_LNC	0.261741
Gm21814_LNC	0.352974
Gm21955_LNC	0.376668
Gm21989_LNC	0.309958
Gm2415_LNC	0.57509
Gm26510_LNC	0.31434
Gm26526_LNC	0.335211
Gm26529_LNC	0.310985
Gm26549_LNC	0.259217
Gm26551_LNC	0.330539
Gm26561_LNC	0.297614
Gm26573_LNC	0.416444
Gm26582_LNC	0.326005
Gm26593_LNC	0.460092
Gm26608_LNC	0.359433
Gm26617_LNC	0.274417
Gm26618_LNC	0.510367
Gm26640_LNC	0.372479
Gm26664_LNC	0.245246
Gm26668_LNC	0.284458
Gm26680_LNC	0.260184
Gm26691_LNC	0.424512
Gm26693_LNC	0.315708
Gm26694_LNC	0.275432
Gm26704_LNC	0.278844
Gm26707_LNC	0.542649
Gm26733_LNC	0.275854
Gm26735_LNC	0.409865
Gm26745_LNC	0.360087
Gm26750_LNC	0.276868
Gm26759_LNC	0.315372
Gm26760_LNC	0.270812
Gm26763_LNC	0.303963
Gm26767_LNC	0.263412
Gm26779_LNC	0.304578
Gm26782_LNC	0.363604
Gm26798_LNC	0.392895
Gm26801_LNC	0.470499
Gm26804_LNC	0.29026
Gm26809_LNC	0.420138
Gm26811_LNC	0.692367
Gm26825_LNC	0.296768
Gm26839_LNC	0.41209
Gm26848_LNC	0.328639
Gm26853_LNC	0.258821
Gm26870_LNC	0.55913
Gm26871_LNC	0.581429
Gm26885_LNC	0.36653
Gm26887_LNC	0.548514
Gm26901_LNC	0.296279
Gm26904_LNC	0.243578
Gm26917_LNC	0.32995
Gm2694_LNC	0.608634
Gm26981_LNC	0.288314
Gm26982_LNC	0.247583
Gm27000_LNC	0.577925
Gm27003_LNC	0.314489
Gm27032_LNC	0.471086
Gm27042_LNC	0.329505
Gm27199_LNC	0.955426
Gm27247_LNC	0.550027
Gm2762_LNC	0.485737
Gm28037_LNC	0.276521
Gm28039_LNC	0.360967
Gm28055_LNC	0.529575
Gm28198_LNC	0.272105
Gm2824_LNC	0.482602
Gm28375_LNC	0.485376
Gm28403_LNC	0.24235
Gm28526_LNC	0.47006
Gm28727_LNC	0.430328
Gm2885_LNC	0.431688
Gm28872_LNC	0.307993
Gm28876_LNC	0.538586
Gm28901_LNC	0.299074
Gm28933_LNC	0.279648
Gm29050_LNC	0.334141
Gm29202_LNC	0.283133
Gm29374_LNC	0.923992
Gm29502_LNC	0.267724
Gm29536_LNC	0.299972
Gm29585_LNC	0.346894
Gm29650_LNC	0.379
Gm2990_LNC	0.914228
Gm30340_LNC	0.401301
Gm3294_LNC	0.462512
Gm33051_LNC	0.281287
Gm37008_LNC	0.242512
Gm37238_LNC	0.284003
Gm37245_LNC	0.451246
Gm37296_LNC	0.31824
Gm37305_LNC	0.290271
Gm37312_LNC	0.262993
Gm37352_LNC	0.537541
Gm37494_LNC	0.326255
Gm37599_LNC	0.352801
Gm3764_LNC	0.836047
Gm37768_LNC	0.393097
Gm37795_LNC	0.385576
Gm37874_LNC	0.301602
Gm37899_LNC	0.35412
Gm38103_LNC	0.873706
Gm38399_LNC	0.332479
Gm4221_LNC	0.313752
Gm42418_LNC	0.358677
Gm42434_LNC	0.433575
Gm42485_LNC	0.618796
Gm42547_LNC	0.349371
Gm4258_LNC	0.468614
Gm42595_LNC	0.240601
Gm42668_LNC	0.902
Gm4285_LNC	0.29488
Gm42890_LNC	0.237366
Gm42944_LNC	0.440372
Gm42984_LNC	0.26897
Gm43268_LNC	0.46083
Gm43379_LNC	0.296642
Gm43584_LNC	0.40692
Gm43597_LNC	0.336065
Gm43660_LNC	0.30912
Gm43672_LNC	0.287794
Gm43733_LNC	0.447449
Gm44051_LNC	0.3181
Gm4419_LNC	0.335984
Gm4425_LNC	0.287394
Gm4430_LNC	0.301294
Gm4779_LNC	0.477555
Gm4890_LNC	0.30216
Gm5441_LNC	0.414893
Gm5577_LNC	0.283456
Gm5607_LNC	0.624878
Gm9581_LNC	0.334375
Gm9725_LNC	0.265989
Gm9750_LNC	0.273125
Gm9801_LNC	0.611572
Gm9828_LNC	0.266255
Gm9929_LNC	0.329243
Gm9954_LNC	0.923087
Gpr137b-ps_LNC	0.325636
Grip1os3_LNC	0.317546
Gt(ROSA)26Sor_LNC	0.293955
H19_LNC	0.414211
H3f3aos_LNC	0.350352
Haglr_LNC	0.433774
Halr1_LNC	0.403264
Has2os_LNC	0.565444
Hotairm1_LNC	0.369284
Hoxb3os_LNC	0.334817
Hoxb5os_LNC	0.763483
Inafm2_LNC	0.352252
Ino80dos_LNC	0.275963
Jpx_LNC	0.379313
Junos_LNC	0.505827
Kantr_LNC	0.270246
Kis2_LNC	0.501266
Lhx1os_LNC	0.810805
Lncenc1_LNC	0.725023
Lncpint_LNC	0.284313
Lockd_LNC	0.418543
Malat1_LNC	0.317701
Map2k3os_LNC	0.376286
Meg3_LNC	0.555296
Miat_LNC	0.461511
Mir124-2hg_LNC	0.482203
Mir124a-1hg_LNC	0.527938
Mir142hg_LNC	0.746501
Mir17hg_LNC	0.304733
Mir99ahg_LNC	0.423977
Mirg_LNC	0.31462
Neat1_LNC	0.677198
Nespas_LNC	0.26208
Pantr1_LNC	0.636023
Phf2os1_LNC	0.313123
Platr10_LNC	0.605398
Platr14_LNC	0.54712
Platr16_LNC	0.542596
Platr17_LNC	0.437089
Platr20_LNC	0.41763
Platr21_LNC	0.479067
Platr22_LNC	0.573895
Platr25_LNC	0.270201
Platr27_LNC	0.50345
Platr3_LNC	0.54368
Platr4_LNC	0.512748
Ptpmt1_LNC	0.271875
Pvt1_LNC	0.545993
R74862_LNC	0.327739
RP23-17C12.1_LNC	0.305106
RP23-207N5.2_LNC	0.808337
RP23-216D14.3_LNC	0.59475
RP23-229E19.4_LNC	0.494518
RP23-231J2.1_LNC	0.351247
RP23-240M8.2_LNC	0.696506
RP23-272F2.2_LNC	0.449741
RP23-335G1.1_LNC	0.357627
RP23-367H8.4_LNC	0.499082
RP23-419K14.8_LNC	0.28119
RP23-474J16.2_LNC	0.627794
RP23-54G8.1_LNC	0.553687
RP23-54G8.4_LNC	0.561488
RP23-59P20.3_LNC	0.522789
RP23-60P18.13_LNC	0.377559
RP23-8I8.4_LNC	0.403317
RP24-120F8.4_LNC	0.287991
RP24-177G14.2_LNC	0.573365
RP24-274B19.1_LNC	0.582289
RP24-439I22.3_LNC	0.346297
RP24-491O6.1_LNC	0.348131
Rab10os_LNC	0.22453
Rian_LNC	0.361204
Rmst_LNC	0.496838
Smim20_LNC	0.260259
Snhg12_LNC	0.329375
Snhg14_LNC	0.450689
Snhg17_LNC	0.263688
Snhg18_LNC	0.351575
Snhg1_LNC	0.341441
Snhg20_LNC	0.249633
Snhg3_LNC	0.345696
Snhg5_LNC	0.319573
Snhg6_LNC	0.287431
Snhg8_LNC	0.318001
Sox2ot_LNC	0.390386
Sp3os_LNC	0.257918
Spata5l1_LNC	0.265644
Tctn2_LNC	0.293229
Tmem134_LNC	0.256861
Tmem147os_LNC	0.374064
Trerf1_LNC	0.395732
Trmt44_LNC	0.293951
Trmt61b_LNC	0.23187
Trp53cor1_LNC	0.293089
Tug1_LNC	0.244977
Wt1os_LNC	0.700588
Zfp335os_LNC	0.257302
